# Supplementary material
Source: publisher site journal article supplement (http://grassroots.asbmb.org/getmedia/abb56274-7868-468b-afbe-70a86817f3ad/ASBMB-brief-NIH-Diversity-Supplements-Pathway-to-Independence.pdf)
Supplement: Supplementary file 1 [file ASBMB-brief-NIH-Diversity-Supplements-Pathway-to-Independence.pdf]

Advocacy


American society for biochemistry and molecular biology

Join


Renew


Donate


About Us


Search

Sign In

- Membership

  - Join the ASBMB
  - Renew
  - Change
  - Gift membership
  - Group memberships
  - Get involved
  - What your dues pay for
  - Membership outreach kit
  - Member directory
- Journals & News

  - Journals & News
  - Journal of Biological Chemistry
  - Molecular & Cellular Proteomics
  - Journal of Lipid Research
  - Lipid Research Division
  - ASBMB Today
- Meetings & Events

  - All meetings and events
  - Annual Meeting
  - On-demand
  - Propose an event
  - Sponsor an event
- Career Resources

  - Career Resources
  - Training Opportunities
  - Job Board
  - Summer Research
  - Awards & Grants
  - Webinars
- Advocacy

  - Advocacy
  - Position Statements
  - Comment Letters
  - Policy Blotter
  - Advocacy Training Program
- Diversity

  - Diversity
  - MOSAIC
  - Diversity in Science Award
  - Undergraduate Scholarship
  - Women in BMB
  - Resources
- Education

  - Education
  - Accreditation
  - Certification Exam
  - Student Chapters
  - Teaching Strategies
  - Science Outreach

- About ASBMB
- Contact Us
- Donate
- Sign In


## Advocacy

The ASBMB works diligently to ensure that researchers' voices are heard so that funding and policy needs are met.

Home
Advocacy

Life science research produces innumerable and invaluable benefits for humanity. We owe a debt of gratitude to the researchers whose hard work and creativity have yielded therapies and technologies that have improved lives and fueled economies.

The ASBMB works to ensure that researchers’ voices are heard in Congress and at federal funding agencies, such as the National Institutes of Health and the National Science Foundation. Throughout the year, the ASBMB ensures that our members engage with policymakers to advocate for biomedical science funding.

The ASBMB's advocacy activities are supported by the Public Affairs Advisory Committee.

### The ASBMB's policy positions

- Advocate for sustainable, predictable and increased funding for scientific research.
- Support the next generation of scientists.
- Increase diversity, equity, access and inclusivity in science, technology, engineering and mathematics.
- Address emerging science related issues e.g. research security, international collaboration, pandemic preparedness, workforce recovery etc.

#### Society News

## ATP delegates push for improved policies

April 5, 2024

This ASBMB program helps advocates gain skills to address issues that affect science and scientists.

Read More

Policy news from ASBMB Today

National Academies propose initiative to sequence all RNA molecules

April 19, 2024
Marissa Locke Rottinghaus

Unlocking the epitranscriptome could transform health, medicine, agriculture, energy and national security.

NIH’s advisory committee releases report on re-envisioning postdoc training

Jan. 8, 2024
Dulce Hiraci Gomez

The working group developed six primary recommendations for the National Institutes of Health.

When authoritative sources hold onto bad data

Dec. 23, 2023
Janet Freilich

A legal scholar explains the need for government databases to retract information.

Can science publishing be both open and equitable?

Dec. 14, 2023
Ankita Arora

An updated memo from the White House Office of Science and Technology Policy has researchers, funders and publishers looking ahead

ASBMB pushes federal agencies to help students struggling with loan debt

Nov. 30, 2023
Sarina Neote

The society states that increasing student debt and financial strain are hurting the U.S. research enterprise and federal agencies must do more to ease this burden.

More policy news

### Position statements

The ASBMB's position on various issues relating to the scientific community.   
See all statements

#### ASBMB endorses the American Innovation Act

Learn more

#### ASBMB statement on the importance of funding the National Science Foundation

Learn more

#### ASBMB statement on Biden's budget request for fiscal year 2025

Learn more

#### ASBMB opposes re-instating the China Initiative in FY24 appropriations

Learn more

### Letters

Correspondence with members of Congress, federal agencies and other entities.  
See all letters

#### ASBMB response to the National Institutes of Health (NIH) Strategic Plan for Data Science 2023–2028

Read letter

#### ASBMB response to the Department of Labor modernizing Schedule A Occupations for the Labor Certification in the United States

Read letter

#### ASBMB response to the National Academies of Sciences, Engineering and Medicine Framework for Equitable and Effective Teaching in Undergraduate STEM Education

Read letter

### Resource guides & issue briefs

#### National Institutes of Health Diversity Supplements: Pathway to Independence

This issue brief analyzes the unique attributes of each NIH diversity supplement program. **Download**

#### Quick guide to the 2023 NIH Data Management and Sharing Policy

A new policy issued by the National Institutes of Health requires a data-management and -sharing plan when submitting extramural grant applications. Review the basics of the plan and whether it applies to you in our quick guide. **Download**

#### Rights and resources for STEM parents

This guide aims to connect future, expecting or current parents in STEM careers with information on how to navigate family planning and childcare in academia. Within are links to curated resources about your rights, relevant labor policies, groups that support parents/parenting policies, safety guidance during pregnancy and more. **Download**

#### LGBTQIA+ resource guide

This guide provides resources for scientists to seeking to participate in LGBTQIA+ advocacy. What’s inside: a link to the ASBMB state and local advocacy toolkit, resources for allies aiming to learn methods for creating inclusive environments for their peers and mentees, and links to LGBTQIA+ organizations. **Download**

## Advocacy newsletter

Enter your email address to sign up for monthly updates from the ASBMB Public Affairs team.

Read past newsletters .

#### Webinar

## From the bench to the ballot: Stories from scientists who have run for office

This session aims to demystify the path from the bench to the ballot by highlighting the experiences of biochemists and molecular biologists serving in office at various levels. They discuss their career trajectories, their experience running for and serving in office and how they use their scientific background in office.

Watch recording

Past webinars

#### Finding the funds: DEAI funding and training opportunities

Learn about DEAI funding and training opportunities at the National Science Foundation and National Institute of General Medical Sciences. More

#### Finding the funds: Department of Energy funding and training opportunities

Learn about the DOE's Office of Science funding priorities, award opportunities and training grants. More

See all public affairs webinars

### Get involved

#### Advocacy toolkit

Best practices for sharing your stories with the policymakers whose decisions affect your work.

Learn more

#### Capitol Hill Day

A program that brings trainees from across the country to meet with their congressional leaders in Washington, D.C.

Learn more

#### Advocacy Training Program

A three-month externship that provides the skills to create change and to become a leader for those seeking to do the same.

Learn more

#### Advocate at the state level

Learn how to conduct a successful advocacy campaign in your state.

Learn more


- Membership
  - Join the ASBMB
  - Renew
  - Change
  - Gift membership
  - Group memberships
  - Get involved
  - What your dues pay for
  - Membership outreach kit
  - Member directory
- Journals & News
  - Journal of Biological Chemistry
  - Molecular & Cellular Proteomics
  - Journal of Lipid Research
  - ASBMB Today
  - Lipid Research Division
  - Advertise with the ASBMB
- Meetings & Events
  - All meetings and events
  - Annual Meeting
  - On-demand
  - Propose an event
  - Sponsor an event
- Career Resources
  - Training Opportunities
  - Job Board
  - Summer Research
  - Awards & Grants
  - Webinars
- Advocacy
  - Position Statements
  - Comment Letters
  - Policy Blotter
  - Advocacy Training Program
- Diversity
  - MOSAIC
  - Diversity in Science Award
  - Undergraduate Scholarship
  - History of Black Scientists
  - Women in BMB
  - Resources
- Education
  - Accreditation
  - Certification Exam
  - Student Chapters
  - Teaching Strategies
  - Science Outreach
- About us
  - Governance
  - Code of conduct
  - Privacy policy
  - Donate

6120 Executive Blvd, Suite 400, Rockville, MD 20852. Phone (240) 283-6600
© Copyright 2024 American Society for Biochemistry and Molecular Biology

- Contact Us
